# Supplementary material
Source: PubMed Central journal article supplement (PMC5581693)
Supplement: NIHMS877394-supplement-1.pdf [file NIHMS877394-supplement-1.pdf]

**A.**

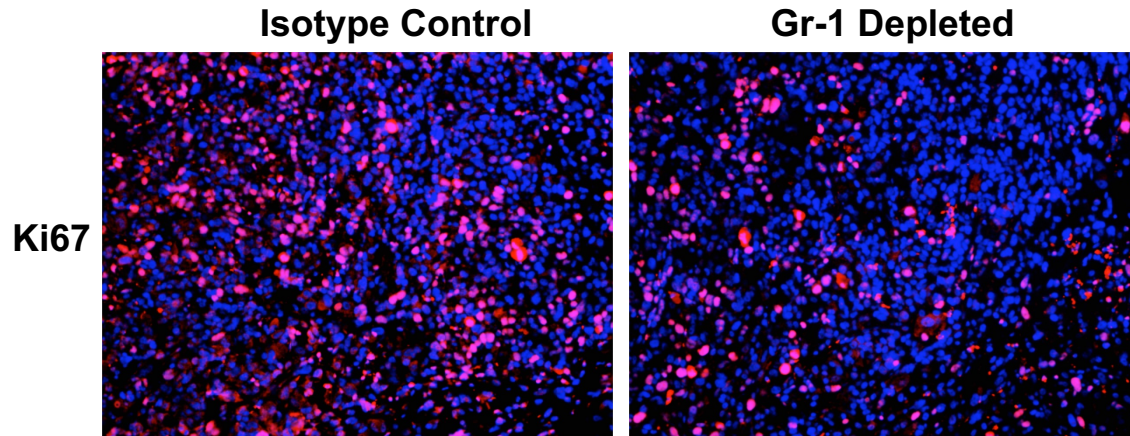

**B.**

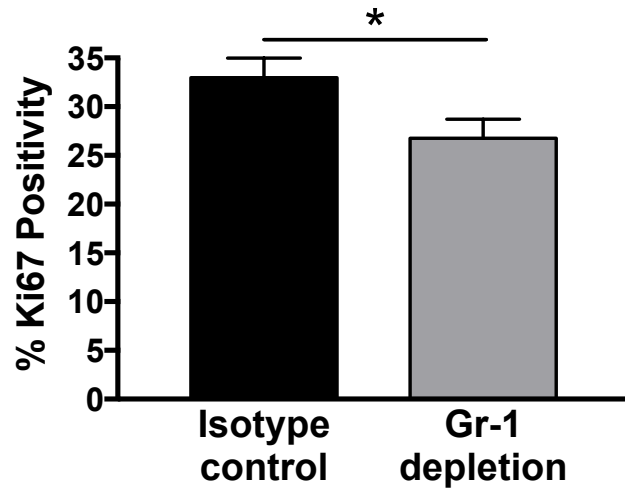

**Supplementary Figure 1.** Depletion of MDSCs with Gr-1 antibody suppresses human prostate cancer xenograft proliferation. A. Representative immunofluorescence stain for Ki67 positive proliferative cells in the isotype control and Gr-1 depleted tumors. B. Percent Ki67 positivity was quantified and compared using unpaired two-tailed t-test (n = 15 per treatment group; 3 areas per tumor, 5 tumors per treatment group; \* p < 0.05).
