# Supplementary material
Source: PubMed Central journal article supplement (PMC5581693)
Supplement: NIHMS877394-supplement-2.pdf [file NIHMS877394-supplement-2.pdf]

**PC3 Xenograft**

**anti-NE**

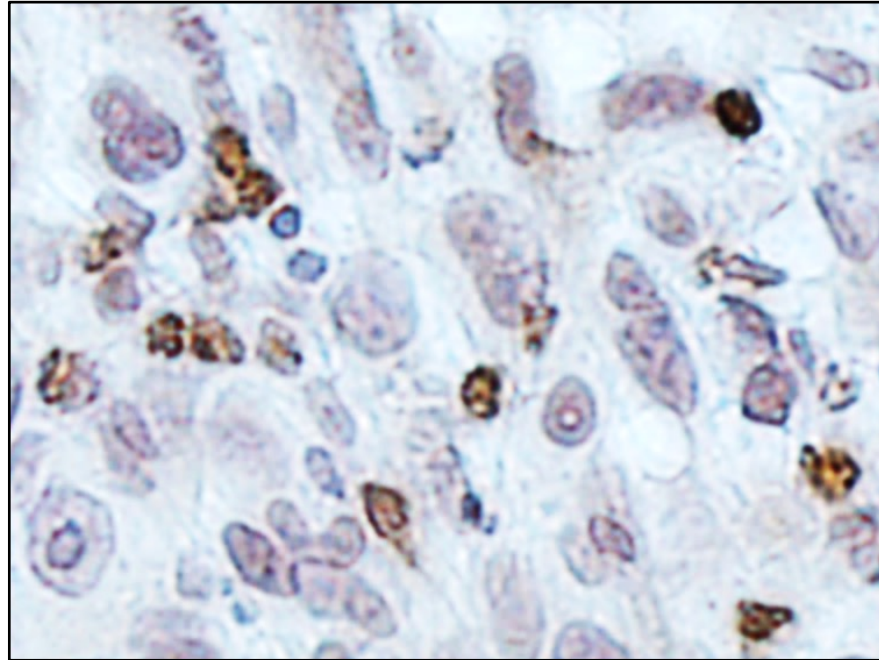

**Supplementary Figure 2.** High power image of neutrophil elastase (NE) localization in the PC3 xenograft from Figure 3C.
