# Supplementary material
Source: PubMed Central journal article supplement (PMC5581693)
Supplement: NIHMS877394-supplement-3.pdf [file NIHMS877394-supplement-3.pdf]

**A.**

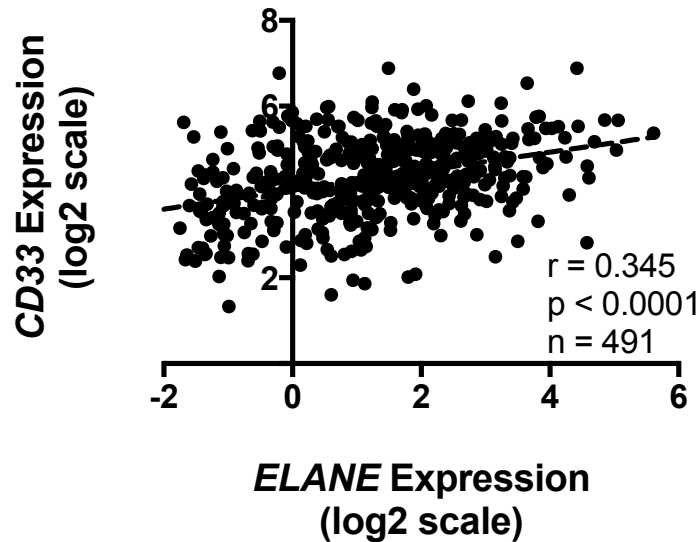

**B.**

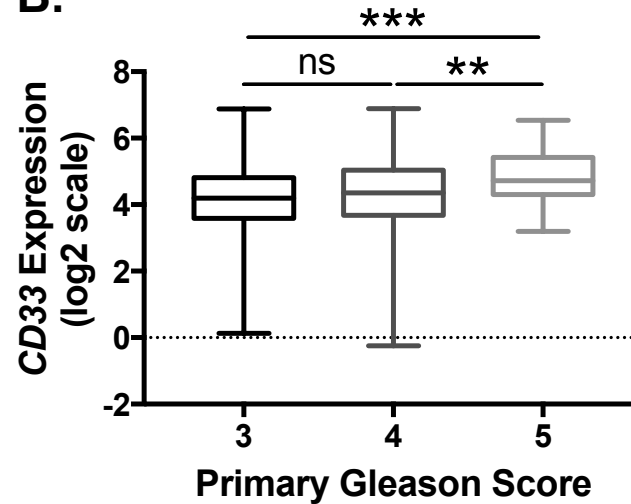

**Supplementary Figure 3:** High *CD33* expression predicts poor clinical outcomes in prostate cancer patients. A. Human prostate cancer *CD33* and *ELANE* mRNA expression data were obtained from the TCGA Provisional prostate cancer dataset (downloaded from <http://cancergenome.nih.gov/>) and plotted to examine correlation using two-tailed Pearson correlation analysis. B. *CD33* expression was assessed based on primary Gleason score using ordinary one-way ANOVA with Tukey's post-hoc testing ( $n = 491$ , \*\*  $p < 0.01$ , \*\*\*  $p < 0.001$ ).
